# Supplementary material
Source: publisher figshare collection journal article supplement (https://acs.figshare.com/ndownloader/files/3771241)
Supplement: Supplementary file 1 [file 3771241]

# Surface Chemical Gradient Affects the Differentiation of Human Adipose-Derived Stem Cells via ERK1/2 Signaling Pathway

*Xujie Liu<sup>a,b</sup>, Shengjun Shi<sup>c\*</sup>, Qingling Feng<sup>b,d\*</sup>, Akash Bachhuka<sup>e</sup>, Wei He<sup>b</sup>, Qianli*

*Huang<sup>b</sup>, Ranran Zhang<sup>b</sup>, Xing Yang<sup>b</sup>, and Krasimir Vasilev<sup>e,f</sup>*

a Graduate School at Shenzhen, Tsinghua University, Shenzhen 518055, China

b State Key Laboratory of New Ceramics and Fine Processing, School of Materials  
Science and Engineering, Tsinghua University, Beijing 100084, China

c The Burns Department of Zhujiang Hospital, Southern Medical University,  
Guangzhou 510280, China

d Key Laboratory of Advanced Materials of Ministry of Education of China, School  
of Materials Science and Engineering, Tsinghua University, Beijing 100084, China

e Mawson Institute, University of South Australia, Mawson Lakes 5095, Australia

f School of Advanced Manufacturing, University of South Australia, Mawson Lakes  
5095, Australia

\*Corresponding author: Tel: 86-10-62782770.

E-mail: biomater@mail.tsinghua.edu.cn (Qingling Feng).

## Methods

The optical density of the stained images was quantified using ImageJ2x software. For OPN staining images, all the images were converted into 8-bit black/white images and then inverted. The optical density value was defined with gray level 255 (white) as a value of 0 and gray level 0 (black) as a value of 2.708. In this way, the mean optical density value of the edited images is proportional to the fluorescence intensity of corresponding original images.

For p-ERK and ALP staining images, all the images were converted into 8-bit black/white images. The optical density value was defined with gray level 255 (white) as a value of 0 and gray level 0 (black) as a value of 2.708. In this way, the mean optical density value of the edited images is proportional to the expression level of p-ERK or ALP.

## Supporting Figures

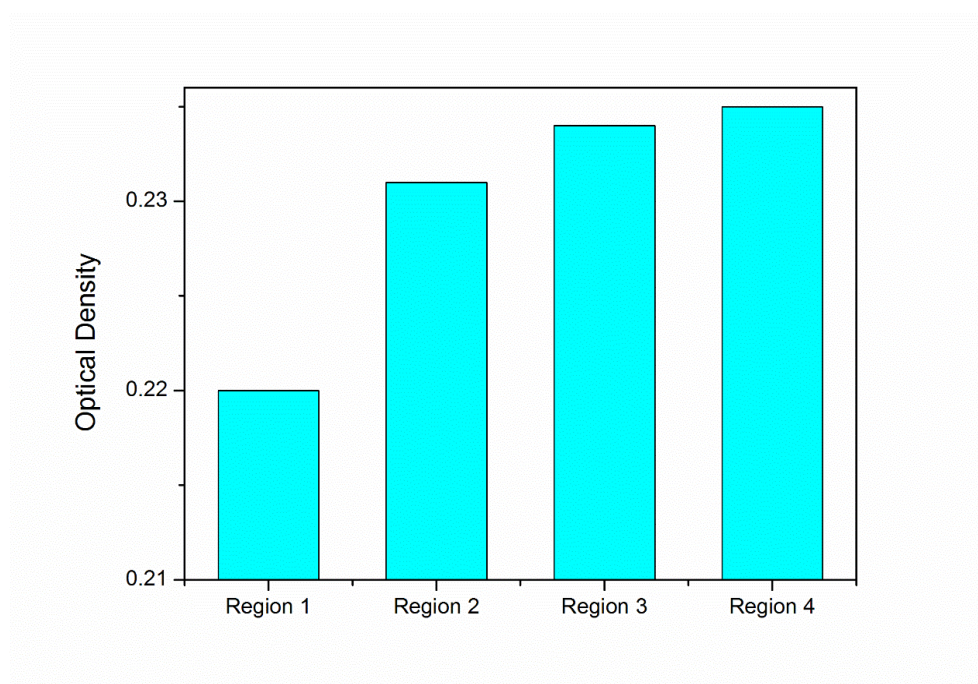

Figure S1. The calculated optical intensity of the p-ERK staining.

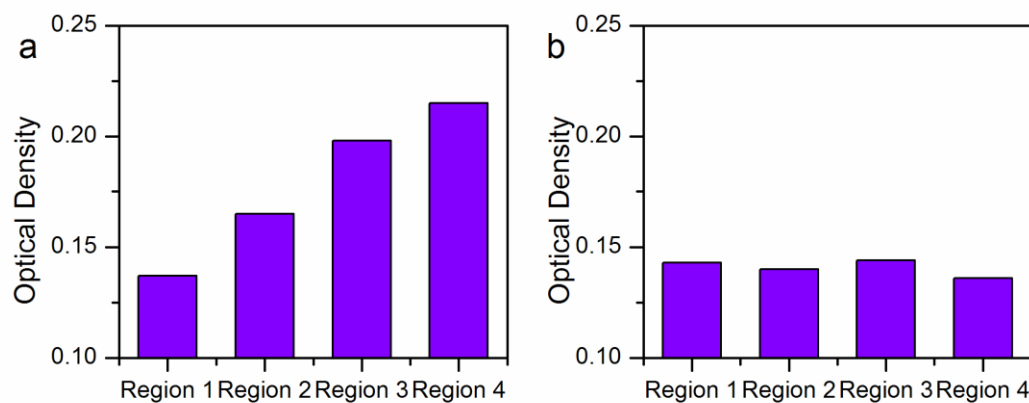

Figure S2. The calculated optical intensity of the ALP staining (a: without PD98059, b: with PD98059).

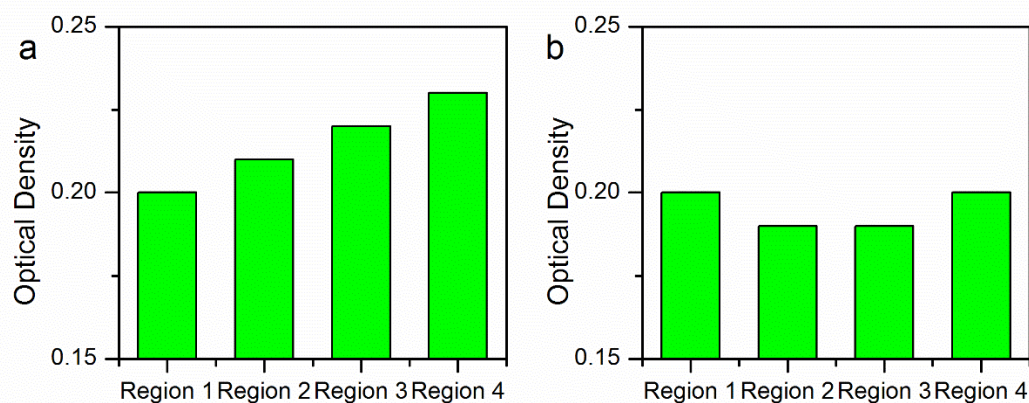

Figure S3. The calculated optical intensity of the OPN staining (a: without PD98059, b: with PD98059).
